# Supplementary material
Source: Springer Nature journal article supplement (https://www.springermedizin.de/resource/supplementary/12985_2012_2134_MOESM4_ESM.pdf/9606692)

**1****2****3****4****5****6****45 kDa**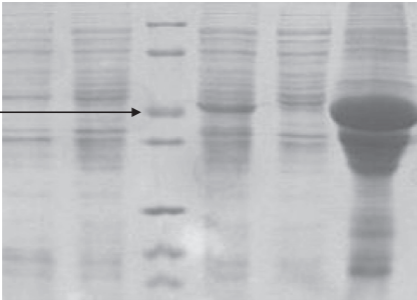**VP6****48 kDa**

Supplement: MOESM4 [file 9606692]
